# Supplementary material for: Pretreatment [18F]FDG PET/CT Prognostic Factors in Patients with Squamous Cell Cervical Carcinoma FIGO IIIC1
Source: MDPI journal article supplement (doi:10.3390/diagnostics11040714), 2021-04-16
Supplement: s1 [file s1]

Table 2a FDG PET CT parameters of patients free of disease

|                       | n  | Average  | Median   | Min      | Max      | SD       |
|-----------------------|----|----------|----------|----------|----------|----------|
| Activity of FDG (mCi) | 68 | 9,166    | 8,750    | 4,3000   | 13,10    | 1,716    |
| Glucose level (mg%)   | 68 | 91,221   | 88,000   | 60,0000  | 160,00   | 17,258   |
| SUVmax                | 68 | 14,353   | 13,275   | 4,5600   | 32,61    | 5,366    |
| SUVmean               | 68 | 8,353    | 7,695    | 2,5800   | 17,93    | 3,171    |
| TumorSUV              | 68 | 4992,336 | 3847,545 | 925,7000 | 20205,41 | 3871,716 |
| TLG                   | 68 | 319,520  | 246,260  | 59,2400  | 1293,15  | 247,797  |
| MTV                   | 68 | 36,275   | 33,610   | 9,4800   | 87,78    | 18,460   |
| SUVtotal              | 68 | 23,274   | 21,930   | 10,6300  | 44,98    | 8,836    |
| TLGtotal              | 68 | 355,113  | 255,975  | 65,2100  | 1769,20  | 303,581  |
| MTVtotal              | 68 | 39,550   | 38,590   | 11,0100  | 90,00    | 19,227   |
| SUVLN                 | 68 | 8,921    | 7,440    | 1,9400   | 26,47    | 5,546    |
| TLGLN                 | 68 | 35,593   | 7,310    | 0,1000   | 1667,97  | 201,298  |
| MTVLN                 | 68 | 3,275    | 2,475    | 0,0500   | 12,97    | 2,790    |
| AUC-CSH               | 68 | 0,582    | 0,579    | 0,5170   | 0,71     | 0,039    |
| Heterogenity          | 68 | 0,268    | 0,271    | 0,1710   | 0,32     | 0,026    |

MTV - metabolic target volume (MTV) of the cervical tumor, MTVLN - MTV obtained from all the metastatic pelvic lymph nodes (PLN), MTVtotal - the sum of MTV of tumor and MTVLN

SD - standard deviation, SUVLN - maximum standardized uptake value of PLN, SUVmax - maximum standardized uptake value of the cervical tumor, SUVmean - mean of standard uptake value of the cervical tumor, SUVtotal the sum of SUVmax of a tumor and SUVmax obtained from all the metastatic PLN, TLG - total lesion glycolysis of the cervical tumor, TLGLN- total lesion glycolysis obtained from all the metastatic PLN, TLGtotal- the sum of TLG of tumor and TLG obtained from all the metastatic PLN, TumorSUV is the sum of all SUV values within the tumor
