# Supplementary material for: Pretreatment [18F]FDG PET/CT Prognostic Factors in Patients with Squamous Cell Cervical Carcinoma FIGO IIIC1
Source: MDPI journal article supplement (doi:10.3390/diagnostics11040714), 2021-04-16
Supplement: s1 [file s1]

Table2b FDG PET CT parameters of patients with recurrence

|                       | n  | Average  | Median   | Min      | Max      | SD       |
|-----------------------|----|----------|----------|----------|----------|----------|
| Activity of FDG (mCi) | 25 | 8,344    | 8,300    | 5,6000   | 12,70    | 1,722    |
| Glucose level (mg%)   | 25 | 90,080   | 87,000   | 56,0000  | 137,00   | 18,312   |
| SUVmax                | 25 | 13,536   | 11,680   | 6,6500   | 26,86    | 5,955    |
| SUVmean               | 25 | 7,781    | 6,380    | 3,7700   | 14,91    | 3,261    |
| TumorSUV              | 25 | 5307,085 | 3929,240 | 652,8600 | 26057,90 | 5165,840 |
| TLG                   | 25 | 330,058  | 245,640  | 26,0300  | 1667,71  | 336,277  |
| MTV                   | 25 | 39,190   | 36,910   | 7,0000   | 115,25   | 23,316   |
| SUVtotal              | 25 | 23,309   | 20,110   | 11,0500  | 45,10    | 9,050    |
| TLGtotal              | 25 | 351,662  | 265,690  | 45,5600  | 1672,91  | 329,947  |
| MTVtotal              | 25 | 42,764   | 38,960   | 8,0600   | 116,56   | 23,164   |
| SUVLN                 | 25 | 9,773    | 7,530    | 2,9100   | 25,58    | 6,232    |
| TLGLN                 | 25 | 21,604   | 8,040    | 1,0600   | 242,80   | 47,475   |
| MTVLN                 | 25 | 3,574    | 2,570    | 0,4200   | 10,82    | 2,810    |
| AUC-CSH               | 25 | 0,579    | 0,576    | 0,5200   | 0,65     | 0,034    |
| Heterogenity          | 25 | 0,269    | 0,272    | 0,2120   | 0,31     | 0,022    |

MTV - metabolic target volume (MTV) of the cervical tumor, MTVLN - MTV obtained from all the metastatic pelvic lymph nodes (PLN), MTVtotal - the sum of MTV of tumor and MTVLN

SD - standard deviation, SUVLN - maximum standardized uptake value of PLN, SUVmax - maximum standardized uptake value of the cervical tumor, SUVmean - mean of standard uptake value of the cervical tumor, SUVtotal the sum of SUVmax of a tumor and SUVmax obtained from all the metastatic PLN, TLG - total lesion glycolysis of the cervical tumor, TLGLN- total lesion glycolysis obtained from all the metastatic PLN, TLGtotal- the sum of TLG of tumor and TLG obtained from all the metastatic PLN, TumorSUV is the sum of all SUV values within the tumor
